# Supplementary material
Source: publisher site journal article supplement (https://www.dovepress.com/article/534105)
Supplement: Supplementary file 1 [file 534105%20Revised%20Supplementary%20Table%20S1.docx]

Supplementary Table S1

Primer information of qrt-PCR

| Primer name | Primer sequence | Fragment length（bp） | Annealing temperature（℃） |
| --- | --- | --- | --- |
| PROX1-F | AAGACGTAGGTCCTCCACCA | 109 | 60 |
| PROX1-R | CGTAGTGTCCCGGGTATGTG |  | 60 |
| ACTIN-F | TCCTCCTGAGCGCAAGTACTCC | 95 | 60 |
| ACTIN-R | CATACTCCTGCTTGCTGATCCAC |  | 60 |
